# Supplementary material
Source: MDPI journal article supplement (https://www.mdpi.com/2227-9040/10/6/209)
Supplement: s1 [file s1]

*Supplementary material*

# **A Highly Sensitive Electrochemical Sensor for Cd<sup>2+</sup> Detection Based on Prussian Blue-PEDOT-Loaded Laser-Scribed Graphene-Modified Glassy Carbon Electrode**

**Londhe Akash Machhindra and Yi-Kuang Yen \***

Department of Mechanical Engineering, National Taipei University of Technology, Taipei 106, Taiwan;  
t108408401@ntut.edu.tw

\* Correspondence: ykyen@ntut.edu.tw

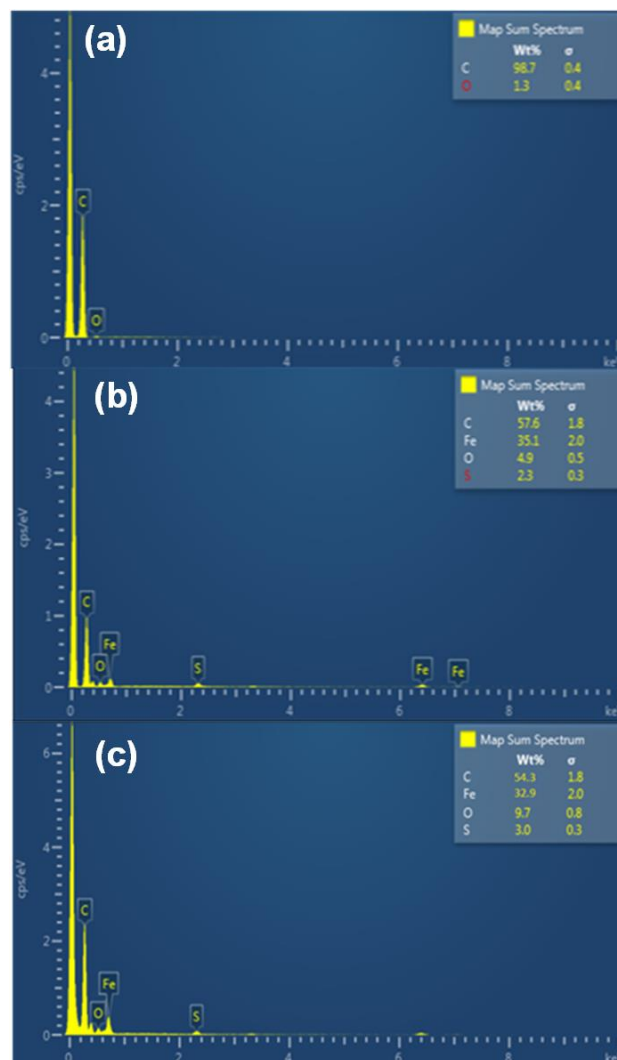

Figure S1. EDS spectrum of the nanocomposite (a) LSG, (b) PB-PEDOT, (c) LSG/PB-PEDOT.

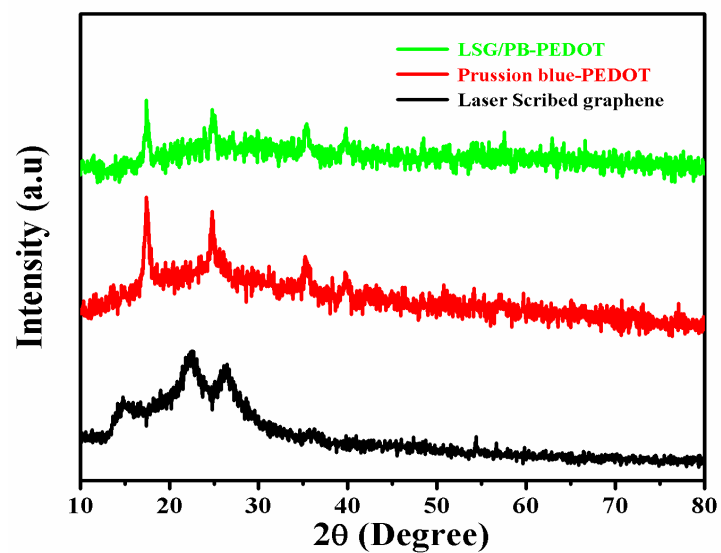

Figure S2. XRD spectrum of LSG, PB-PEDOT and LSG/PB-PEDOT.

**Table S1.** Electrochemical characteristic of different modified electrodes.

| Electrode        | E <sub>pa</sub> (mV) | E <sub>pc</sub> (mV) | ΔE <sub>p</sub> (mV) | I <sub>pa</sub> (A) | I <sub>pc</sub> (A) | ΔI <sub>p</sub> (A) |
|------------------|----------------------|----------------------|----------------------|---------------------|---------------------|---------------------|
| Bare GCE         | 0.239                | 0.207                | 0.032                | 11.88               | -15.05              | 3.17                |
| PB-PEDOT/GCE     | 0.313                | 0.182                | 0.131                | 130.73              | -177.07             | -46.34              |
| LSG/GCE          | 0.296                | 0.193                | 0.103                | 238.48              | -264.62             | 26.14               |
| PB-PEDOT/LSG/GCE | 0.358                | 0.123                | 0.235                | 560.15              | -572.43             | 12.298              |

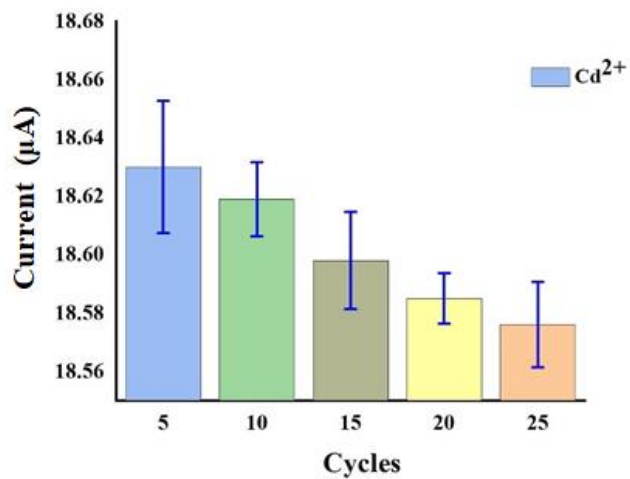

**Figure S3.** The DPV current response of PB-PEDOT/LSG/GCE at difference cycles in 0.1 M Acetate buffer solution (pH = 5.0) containing 500 μM Cd<sup>2+</sup>.
